# Supplementary material for: Metagenomic Analyses Reveal the Involvement of Syntrophic Consortia in Methanol/Electricity Conversion in Microbial Fuel Cells
Source: PubMed Central journal article supplement (PMC4031174; doi:10.1371/journal.pone.0098425), 2014-05-22

**A****MYOXA3 METABOLISM**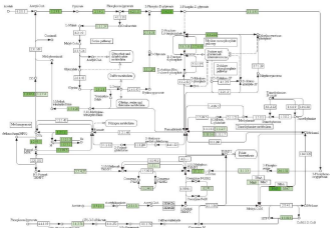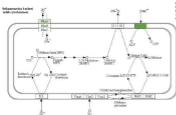

**Metabolic cycle**  
 Metabolic cycle  
 Metabolic cycle  
 Metabolic cycle  
 Metabolic cycle

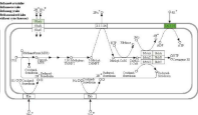



C

CITRATE CYCLE (TCA CYCLE)

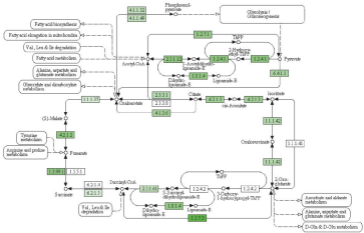

Supplement: pone.0098425.s003.pdf [file pone.0098425.s003.pdf]
